# Supplementary material for: Evidence of a Protein-Coding Gene Antisense to the UL5 Gene in Bovine Herpesvirus I
Source: Viruses. 2023 Sep 22;15(10):1977. doi: 10.3390/v15101977 (PMC10610667; doi:10.3390/v15101977)
Supplement: Supplementary file 1 [file viruses-15-01977-s001.zip › viruses-2516306-supplementary.pdf]

# Evidence of a protein-coding gene antisense to the U<sub>L</sub>5 gene in Bovine Herpesvirus I

Victoria A. Jefferson<sup>1</sup>, Hannah Bostick<sup>1</sup>, Darby Oldenburg<sup>2</sup> and Florencia Meyer<sup>1,\*</sup>

<sup>1</sup> Department of Biochemistry, Molecular Biology, Entomology & Plant Pathology, Mississippi State University, 32 Creelman St., Starkville, MS 39762, USA; vaj13@msstate.edu (V.A.J.); hannah.bostick.04@gmail.com (H.B.)

<sup>2</sup> Gundersen Medical Foundation, 1900 South Ave., La Crosse, WI 54601, USA; dgoldenb@gundersenhealth.org (D.O.)

\* Correspondence: florencia.meyer@msstate.edu

## Supplementary Figures S1-S6

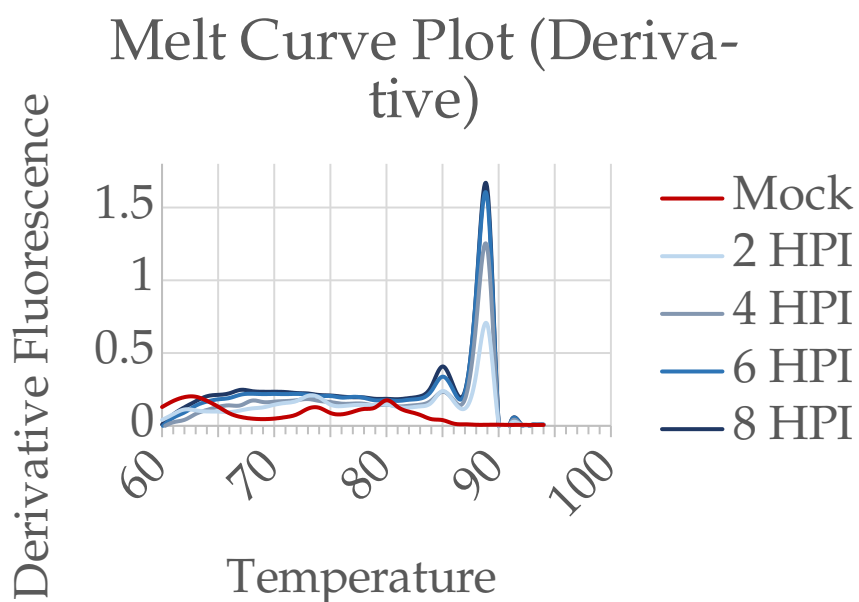

**Supplementary Figure S1.** Derivative melt curve plot for ORF M primers. The derivative fluorescence detected from 60 to 100C is illustrated for mock-infected and cells infected for 2, 4, 6, and 8 hours. All infected samples display sharp peaks, and no distinct peak is produced by mock samples.



BoHV-1.1\_ORF\_M 379  
BoHV-1.2 464  
BoHV-5 464  
HSV-1\_UL5.6 103  
HSV-2\_hypothetical\_protein 103  
CvHV-1 464  
CpHV-1 464  
MCMV\_m105.5\_sORF 184  
PRV\_UL5-UL4 449  
EHV-3 464  
consensus>70

BoHV-1.1\_ORF\_M 400  
BoHV-1.2 524  
BoHV-5 524  
HSV-1\_UL5.6 124  
HSV-2\_hypothetical\_protein 124  
CvHV-1 524  
CpHV-1 524  
MCMV\_m105.5\_sORF 205  
PRV\_UL5-UL4 509  
EHV-3 524  
consensus>70

BoHV-1.1\_ORF\_M 460  
BoHV-1.2 584  
BoHV-5 584  
HSV-1\_UL5.6 584  
HSV-2\_hypothetical\_protein 584  
CvHV-1 584  
CpHV-1 584  
MCMV\_m105.5\_sORF 265  
PRV\_UL5-UL4 569  
EHV-3 584  
consensus>70

BoHV-1.1\_ORF\_M 520  
BoHV-1.2 644  
BoHV-5 644  
HSV-1\_UL5.6 244  
HSV-2\_hypothetical\_protein 244  
CvHV-1 644  
CpHV-1 644  
MCMV\_m105.5\_sORF 629  
PRV\_UL5-UL4 644  
EHV-3 644  
consensus>70

BoHV-1.1\_ORF\_M 580  
BoHV-1.2 704  
BoHV-5 704  
HSV-1\_UL5.6 304  
HSV-2\_hypothetical\_protein 304  
CvHV-1 704  
CpHV-1 704  
MCMV\_m105.5\_sORF 689  
PRV\_UL5-UL4 704  
EHV-3 704  
consensus>70

BoHV-1.1\_ORF\_M 640  
BoHV-1.2 762  
BoHV-5 762  
HSV-1\_UL5.6 364  
HSV-2\_hypothetical\_protein 364  
CvHV-1 762  
CpHV-1 762  
MCMV\_m105.5\_sORF 747  
PRV\_UL5-UL4 762  
EHV-3 762  
consensus>70

BoHV-1.1\_ORF\_M 700  
BoHV-1.2 792  
BoHV-5 792  
HSV-1\_UL5.6 424  
HSV-2\_hypothetical\_protein 424  
CvHV-1 792  
CpHV-1 792  
MCMV\_m105.5\_sORF 777  
PRV\_UL5-UL4 792  
EHV-3 792  
consensus>70

BoHV-1.1\_ORF\_M 760  
BoHV-1.2 833  
BoHV-5 833  
HSV-1\_UL5.6 484  
HSV-2\_hypothetical\_protein 484  
CvHV-1 833  
CpHV-1 833  
MCMV\_m105.5\_sORF 818  
PRV\_UL5-UL4 833  
EHV-3 833  
consensus>70

```

BoHV-1.1_ORF_M      811  A C C T C C A G T A G T A C A C G A G G T C G C G G A A C T G C A C G T C C T G G A T G C T G G G C G G G C T G G C C
BoHV-1.2            872  T C T T C G C A C C G C G A G G T G A G C G C T A C A . . . . .
BoHV-5              872  T C T T C A C A C C G C G A G G T G A G C G C T A C A . . . . .
HSV-1_UL5.6         544  A C C T C C A G T A G . . . . .
HSV-2_hypothetical_protein 872  T C C T C G C A C C G C G A G G T G A G C G C T A C A . . . . .
CvHV-1              872  T C C T C G C A C A A G G A G G T G A G C G C G T A C A . . . . .
CpHV-1              872  T C C T C G C A C A A G G A G G T G A G C G C G T A C A . . . . .
MCMV_m105.5_sORF   857  T C G T C G C A C C G C G A G G T C A G C G C G T A C A . . . . .
PRV_UL5-UL4         872  T C C T C C A C A A G G A G G T C A G C G C T A C A . . . . .
EHV-3               872  T C C T C C A C A A G G A G G T C A G C G C T A C A . . . . .
consensus>70       . c . t c . c a . . . . . a . . . . . a g . . . . . c . . . . . a . . . . .

BoHV-1.1_ORF_M      871  G C G C A A A C G T A C T G G T G C C G G C C A G C T G C G C C T G C A C G T G G T T G G C G C G G A A G C C A A A C
BoHV-1.2            900  . . . . . T G A G C C G C C T C C A C G C G C A C C T C A . . . . .
BoHV-5              900  . . . . . T G A G C C G C C T C C A C G C G C A C C T C A . . . . .
HSV-1_UL5.6         900  . . . . . T G A G C C G C C T C C A C G C G C A C C T C A . . . . .
HSV-2_hypothetical_protein 900  . . . . . T G A G C C G C C T C C A C G C G C A C C T C A . . . . .
CvHV-1              900  . . . . . T G A G C C G C C T C C A C G C C C A C C T C A . . . . .
CpHV-1              900  . . . . . T G A G C C G C C T C C A C G C C C A C C T C A . . . . .
MCMV_m105.5_sORF   885  . . . . . T G A G C C G C C T G C C A C G C G C A C C T C A . . . . .
PRV_UL5-UL4         900  . . . . . T G C G A A G C T G C A C G C C A C C T C A . . . . .
EHV-3               900  . . . . . g . . . . . c t . c . c . . . . . c a c . t . . . . .
consensus>70       . . . . . g . . . . . c t . c . c . . . . . c a c . t . . . . .

BoHV-1.1_ORF_M      931  T C T T G G A A G A T G G T G T T G A T G T G A C G G C T G T G G T A G G C G G T G C T A G C G C G G C T A G C T T
BoHV-1.2            924  . . . . . A G G T C G C C G A G G G C C G C A G C C G C T T
BoHV-5              924  . . . . . A G G T C G C C G A G G G C C G C A G C C G C T T
HSV-1_UL5.6         924  . . . . . A G G T C G C C G A G G G C C G C A G C C G C T T
HSV-2_hypothetical_protein 924  . . . . . A G G T C G C C G A G G G C C G C A G C C G C T T
CvHV-1              924  . . . . . A G G T C G C C G A G G G C C G C A G C C G C T T
CpHV-1              924  . . . . . A G G T C G C C G A G G G C C G C A G C C G C T T
MCMV_m105.5_sORF   909  . . . . . A G G T G G C G G G C A C G C G . . . . . C A G T T
PRV_UL5-UL4         924  . . . . . A G G T G G C C G G G G A G G G C . . . . . C A G T T
EHV-3               924  . . . . . a g g . . g . . g . . . . . t . . . . .
consensus>70       . . . . . a g g . . g . . g . . . . . t . . . . .

BoHV-1.1_ORF_M      991  T A G G T A G A C G T T T T G C G C G G C G A C G C G C T . . . . . C G C G C C C G T G A T C A C G C A G T C G A G C G T
BoHV-1.2            950  G T G G T C T T T A C G C T A C C C G T G T A C A C T T T G T C A A C A T C C G C A C C T T C G A G G A C T A C C G C
BoHV-5              950  G T G G T C T T T A C G C T A C C C G T A T A C A C T T T G T C A A C A T C C A C A C C T T C G A G G A C T A C C G C
HSV-1_UL5.6         950  . . . . . T G C C G T G T A C A C T T T G T C A A C A T C C G C A C C T T C G A G G A C T A C C G C
HSV-2_hypothetical_protein 950  G T G G T C T T C A C G C T G C C G T G T A C A C T T T G T C A A C A T C C G C A C C T T C G A G G A C T A C C G C
CvHV-1              950  G T G G T C T T C A C C C T G C C C G T G T A C A C G T T T G T T A A C A T T C G C A C C T T C G A G G A A T A C C G C
CpHV-1              950  G T G G T C T T C A C C C T G C C C G T G T A C A C G T T T G T T A A C A T T C G C A C C T T C G A G G A A T A C C G C
MCMV_m105.5_sORF   932  G T G G T C T T C A C G C T C C C . . . . .
PRV_UL5-UL4         947  G T G G T C T T C A C G C T G C C C G C G T A C A C . . . . .
EHV-3               947  g g t . . . . . t . c . . . . .
consensus>70       . . . . . g g t . . . . . t . c . . . . .

BoHV-1.1_ORF_M      1048  C T C G C T G A G G G T T . . . . . T G G A T G C A G G T G C T T T . . . . . T G
BoHV-1.2            1010  A C C G C C A C G G G C C A G C C G G G G C T G G G G G T G G A A A A T G G C T G C A G G C C A A C T C G G G C C G
BoHV-5              1010  A C C G C C A C G G G C C A G C C G G G G C T G G G G G T G G A A A A T G G C T G C A G G C C A A C T C G G G C C G
HSV-1_UL5.6         1010  . . . . . G C C G C C A C G G G C C A G C C G G G G C T G C G C G T G G A G A A G T G G C T G C A G G C C A A C T C G G G C C G
HSV-2_hypothetical_protein 1010  G C C G C C A C G G G C C A G C C G G G G C T G C G C G T G G A G A A G T G G C T G C A G G C C A A C T C G G G C C G
CvHV-1              1010  G C C G C C A C G A A C C A G C C C G G G C T G C G C G T G G A G A A G T G G C T G C A G G C C A A C T C C G G C C G
CpHV-1              949  . . . . . G
MCMV_m105.5_sORF   949  . . . . .
PRV_UL5-UL4         949  . . . . .
EHV-3               949  . . . . .
consensus>70       . . . . . G . . . . .

```

**Supplementary Figure S2.** Multiple sequence alignment using full ORF M nucleotide sequence (divided in three panels).

```

BoHV-1.1_ORF_M      1  RPELACSHFSTPSPGWPVAVRSSSKVRMLTKVYTGSVKTTKRLRPSATLRCAWRRRLMALTS
HSV-1_UL5.6         .....
HSV-2_hypothetical_protein .....
MCMV_m105.5_sORF    .....
consensus>70        .....

BoHV-1.1_ORF_M      61  RCEESRVQPGRFAGLLMKASGTTNLSTSARCSSVTGRPYSSVLSSPNSYSWORLLLMKM
HSV-1_UL5.6         1  .....MCSVMGRPYSSTFMRLPNSCSTHRLLLIKM
HSV-2_hypothetical_protein 1  .....MCSVMGRPYSSTFMRLPNSCSTHRLLLIKM
MCMV_m105.5_sORF    1  .....TCSDLRGSPNSMCLSRSPNSRSQRLLLMNM
consensus>70        .....CSsv.GrPySs...r.PNS.S..RLLLmkM

BoHV-1.1_ORF_M      121 VOLCGIAAYSRVGLVIRQVRFSLERTRHFSLWCSKVDSRESVGVGEPTQTTGMAPSR
HSV-1_UL5.6         32 AOLYERRAYSRVRLQMRVYSTFSLWRTEHRSFWSKVDSRDVAVVGEPTHNTGRRRAA
HSV-2_hypothetical_protein 32 AOLCERRVYSRRVRLQMRVYSTFSLCRTEHRSFWSKVDSREAVWVGDPHTSTGRRRPA
MCMV_m105.5_sORF    32 AOLWATSQYSRRTGSLMSAERTSMFRCSTRFCVRWS...A...
consensus>70        .QL....YSr.v.l.mr.v.Tfsl.rT.h.s.wcSkvds.e.v.vgept.t.tg....

BoHV-1.1_ORF_M      181 YCAESCAALMSHQQTAVRMCRPSSPASSMTITLLRANAGSEPNTQGASRSTAPRGRPA
HSV-1_UL5.6         92 YWGVWYRALIIHQQYTTAVRR.....
HSV-2_hypothetical_protein 92 YWGVWYRALIIHQQYTTVVSRCRPRSPASSMTIMLLRVKAGSAPCVTEARRVRAPWPSPK
MCMV_m105.5_sORF    92 .....
consensus>70        y.....al..hqq.tt.v.....

BoHV-1.1_ORF_M      240 ASSAARSASNCPREAAAPSSRRE...MSPSTSQYTRSRNCTSWMLGGGLAAQTYWCRPSCA
HSV-1_UL5.6         .....
HSV-2_hypothetical_protein 152 VCSRAVRAWNSFRASSPPCAARARLVMSRITSQ.....
MCMV_m105.5_sORF    .....
consensus>70        .....

BoHV-1.1_ORF_M      297 CTWLARKPNSWKMVLMRLWAVVGGGLVDVLRGDARRARDHAVERLAEGLDAGAF
HSV-1_UL5.6         .....
HSV-2_hypothetical_protein .....
MCMV_m105.5_sORF    .....
consensus>70        .....

```

**Supplementary Figure S3.** Multiple sequence alignment using the full ORF M amino acid sequence.

20 HPI: 100x Total Magnification  
DAPI & gE                      Phase Contrast

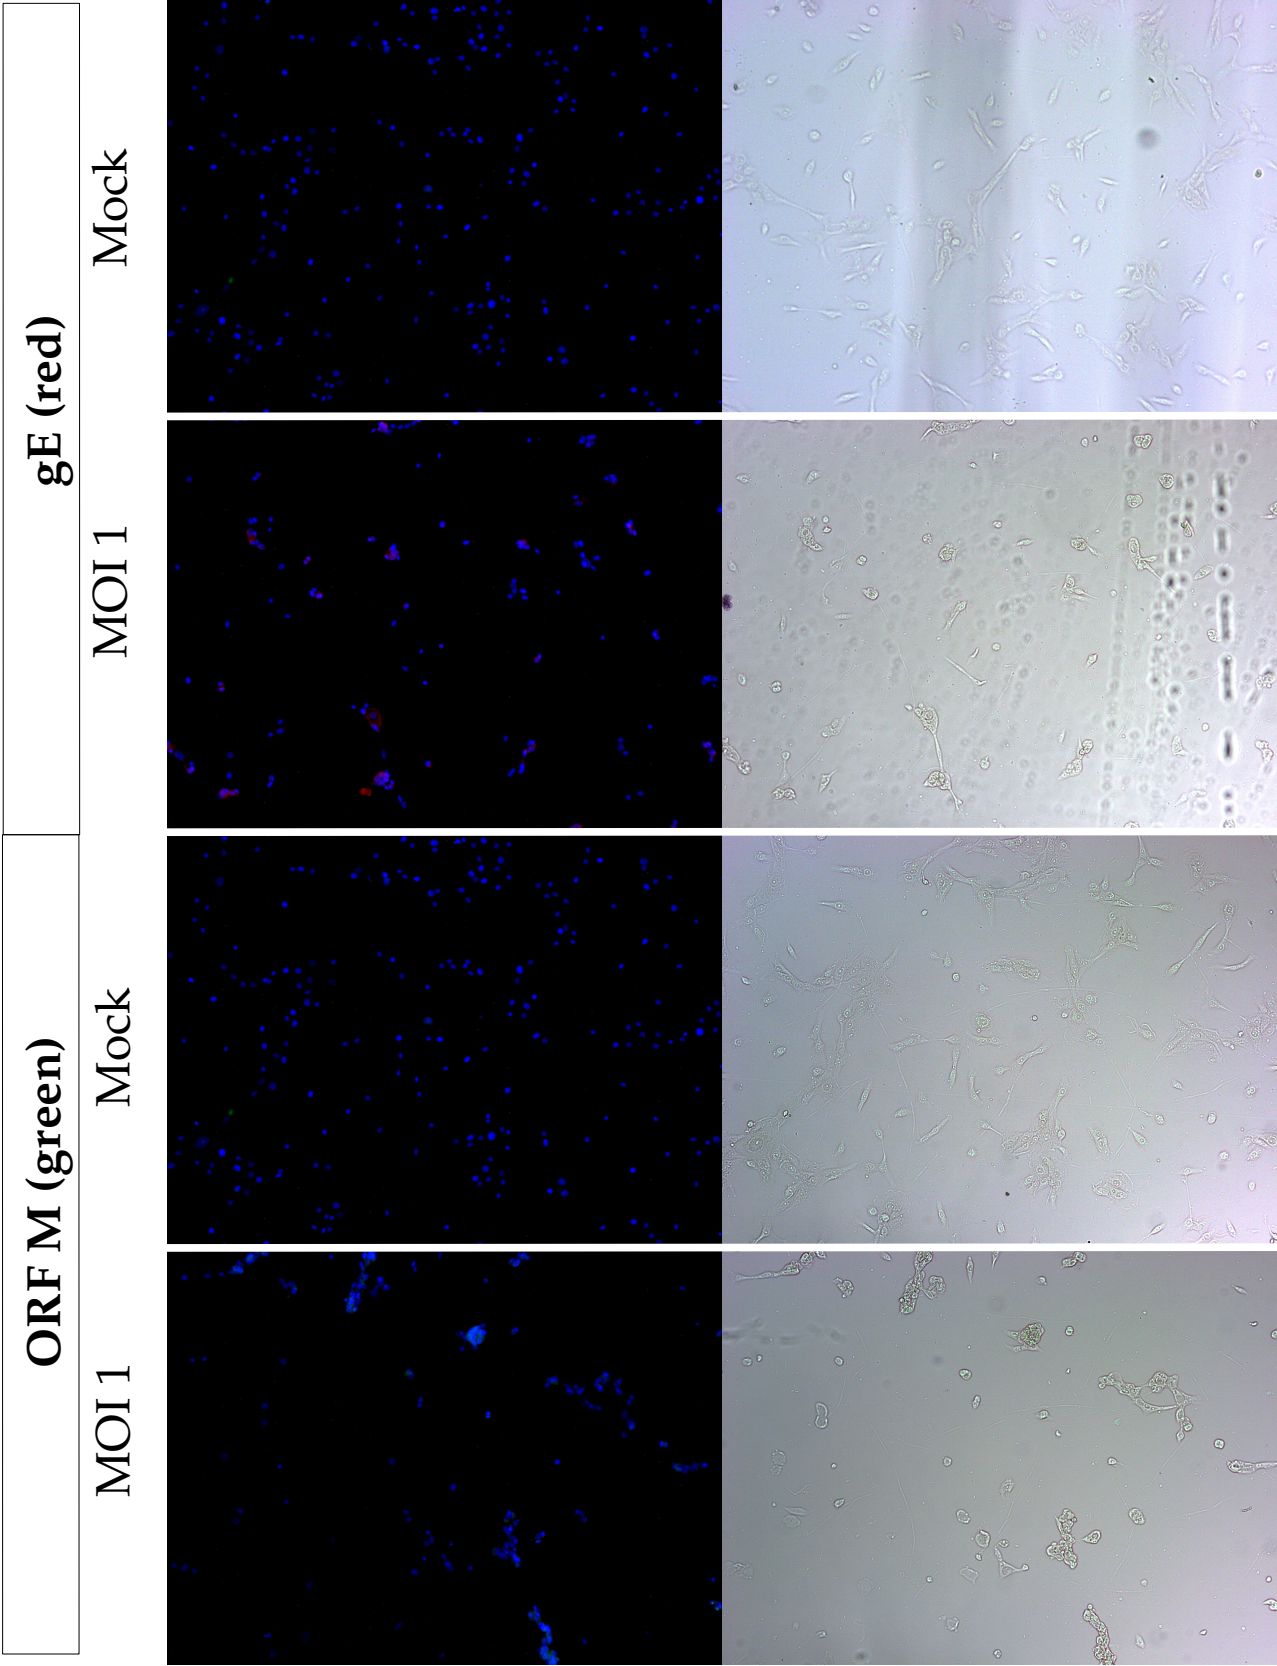

20 HPI: 400x Total Magnification

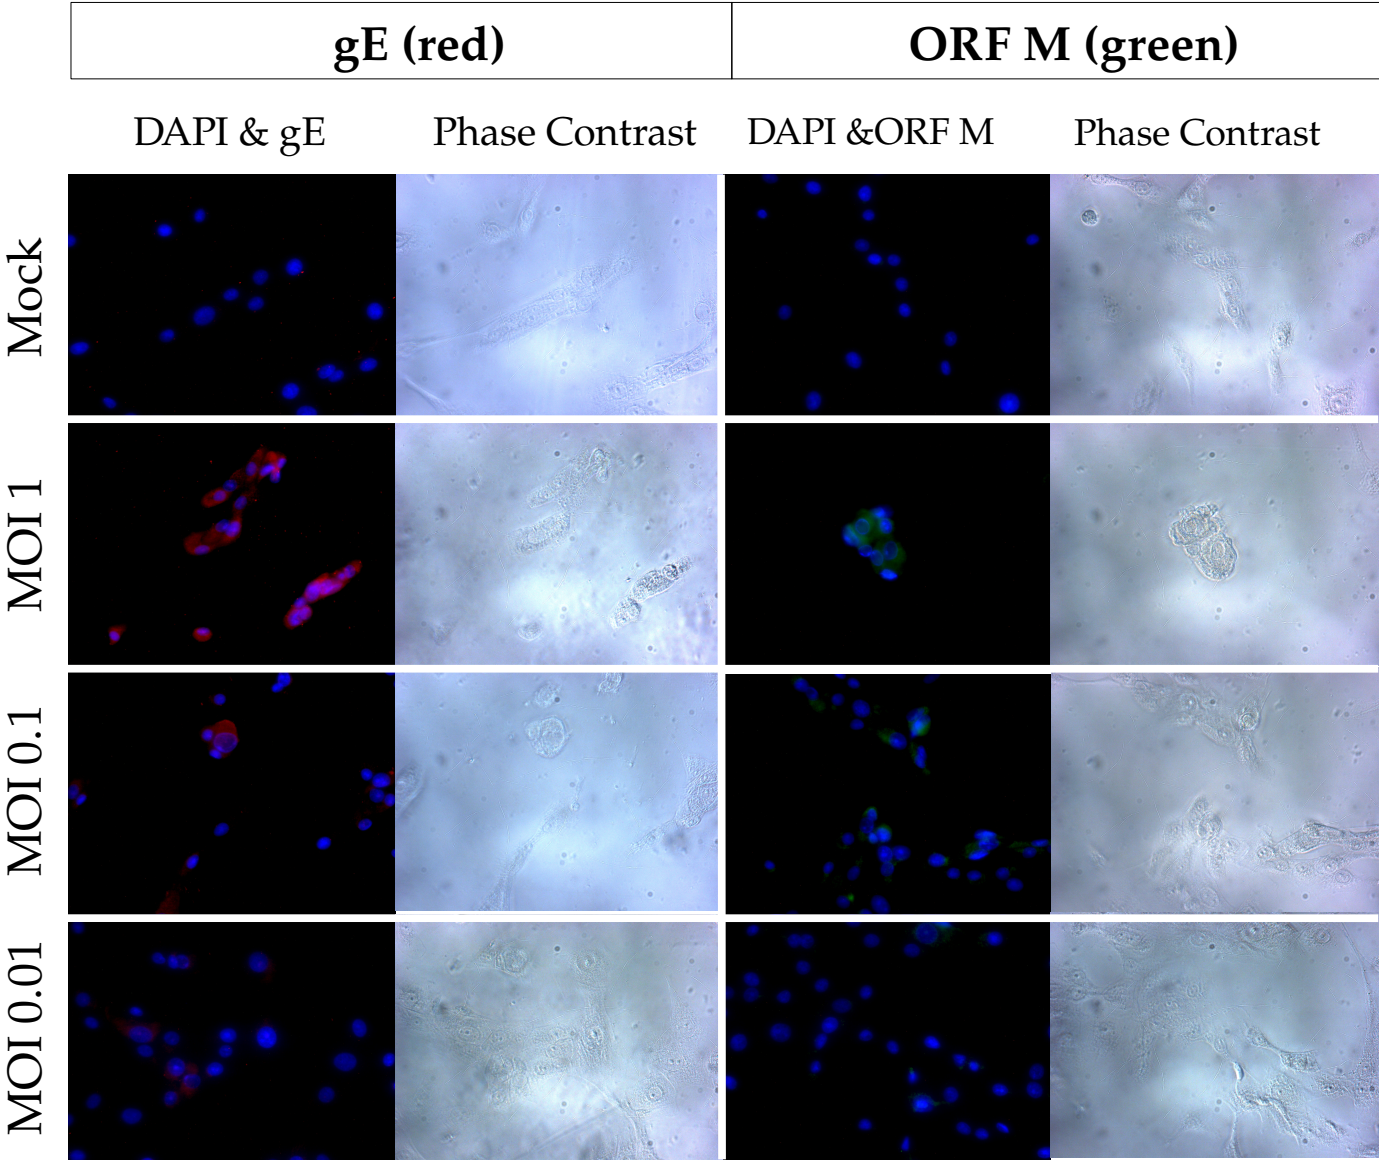

20 HPI: 1000x Total Magnification

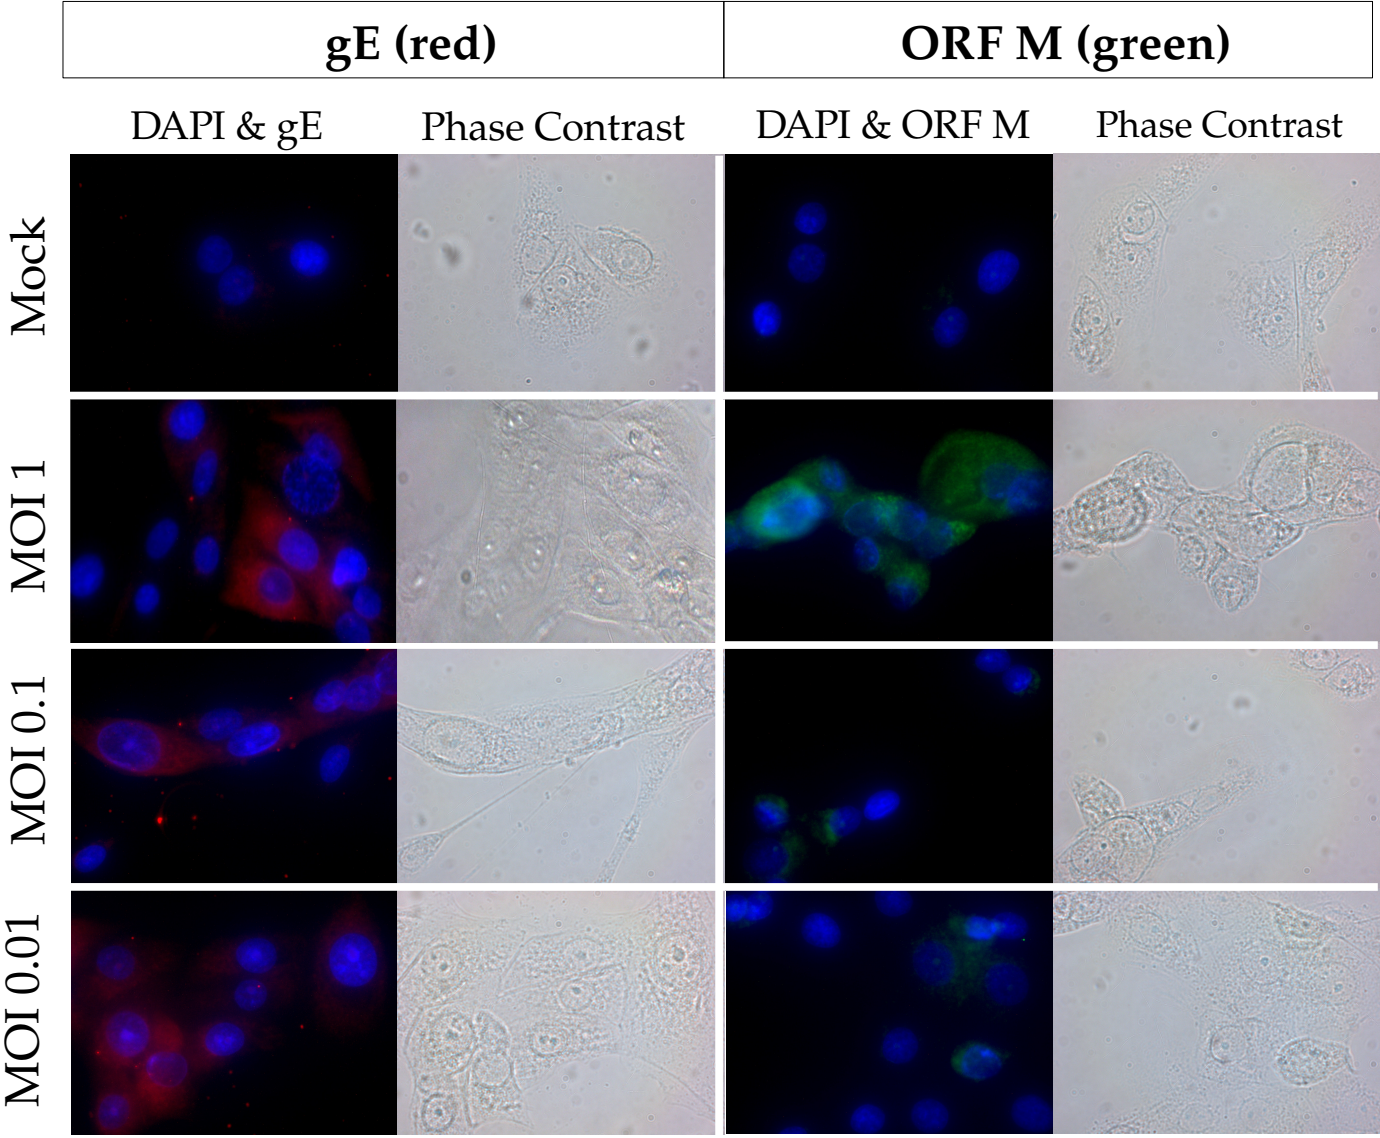

**Supplementary Figure S4.** Images of MDBK cells infected at various MOIs for 20 hours displayed at 100x, 400x, and 1000x (total) magnification. Images were captured with DAPI (blue), Texas Red (red) or FITC (green) filters. The phase contrast image to the right shows the appearance of cultured cells. Viral glycoprotein E was detected using an AlexaFluor594 secondary antibody (red), while ORF M was detected using an AlexaFluor488 conjugate secondary antibody (green). Nuclei were stained with DAPI stain (blue).

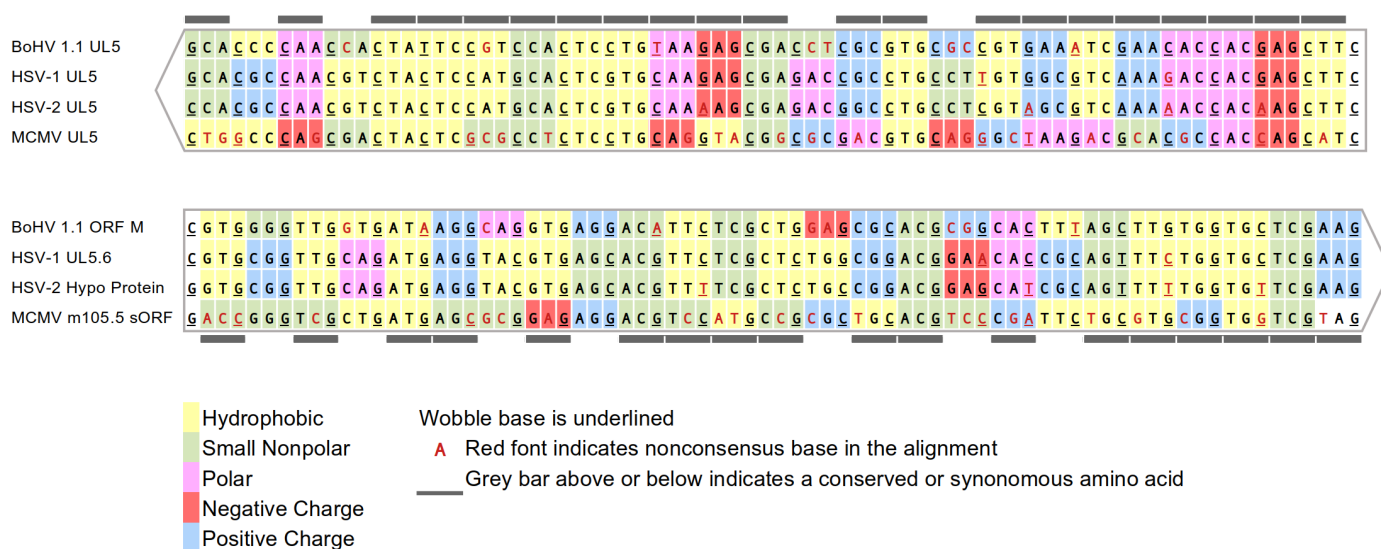

**Supplementary Figure S5.** Amino Acid Conservation of UL5 Homologs and Antisense Sequences. Using the nucleotide sequence of the p-loop (phosphate binding region) of the helicase subunit coded by UL5 that overlaps ORF M and its homologs, this diagram illustrates how conservation of UL5 amino acid sequence does not necessarily transfer to the same conservation in the antisense amino acid sequence. Direction of each amino acid sequence is indicated with the gray arrow-shaped outline.

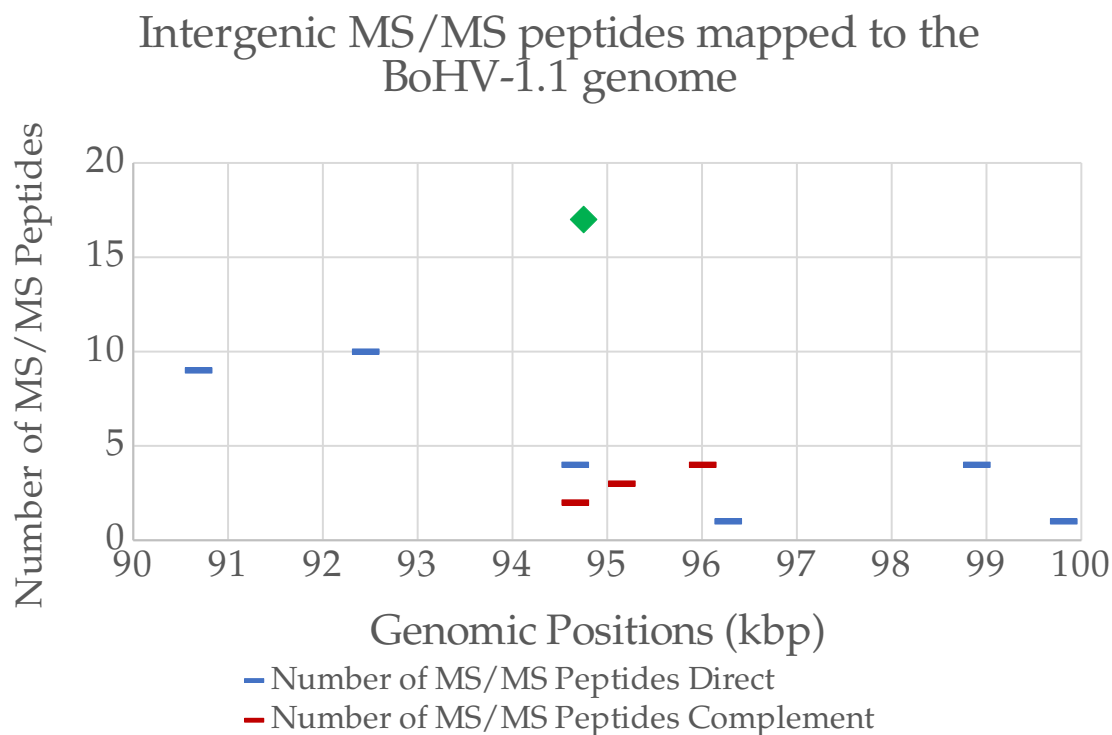

**Supplementary Figure S6.** Visual representation of intergenic peptides detected by MS/MS that mapped to genomic coordinates 90,000-100,000. Peptides mapping to both direct and complement strands are shown. ORF M is differentiated from other complement peptides by the green diamond.
